# Supplementary material for: Molecular phylogeny of Polyneoptera (Insecta) inferred from expanded mitogenomic data
Source: PubMed Central journal article supplement (PMC5080581; doi:10.1038/srep36175), 2016-10-26
Supplement: srep36175-s1.pdf [file srep36175-s1.pdf]

# **Molecular phylogeny of Polyneoptera (Insecta) inferred from expanded mitogenomic data**

Nan Song<sup>1 \*</sup>, Hu Li<sup>2</sup>, Fan Song<sup>2</sup>, Wanzhi Cai<sup>2 \*</sup>

1 College of Plant Protection, Henan Agricultural University, Zhengzhou, China,

2 Department of Entomology, China Agricultural University, Beijing, China

\* E-mail: [songnan@henau.edu.cn](mailto:songnan@henau.edu.cn); [caiwz@cau.edu.cn](mailto:caiwz@cau.edu.cn)

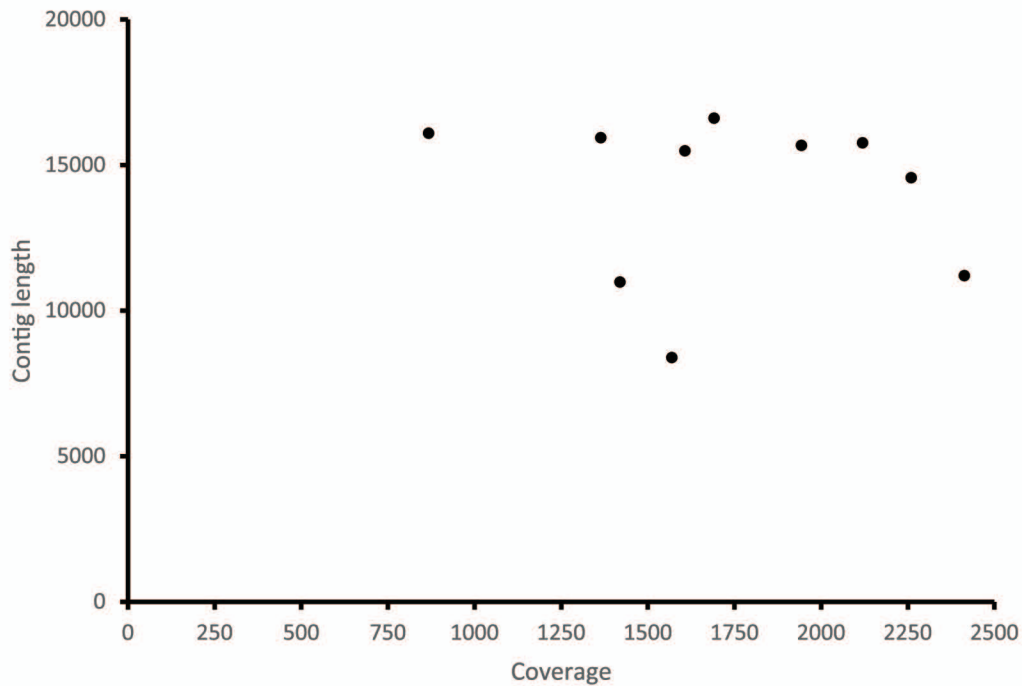

Fig. S1. Mean sequencing coverage versus assembly (contig) length for 11 mitochondrial genomes sequenced in this study.

**Table S1. Taxonomic information and GenBank accession numbers for the taxa included in this study.**

| Item     | Subclass     | Infraclass | Higher taxon | Order         | Superfamily   | Family          | Species                              | GenBank accession |
|----------|--------------|------------|--------------|---------------|---------------|-----------------|--------------------------------------|-------------------|
|          | Monocondylia | -          | -            | Archaeognatha | -             | Meinertellidae  | <i>Nesomachilis australica</i>       | NC_006895         |
|          | Monocondylia | -          | -            | Archaeognatha | -             | Machilidae      | <i>Petrobius brevistylis</i>         | NC_007688         |
|          | Monocondylia | -          | -            | Archaeognatha | -             | Machilidae      | <i>Trigoniophthalmus alternatus</i>  | NC_010532         |
|          | Dicondylia   | -          | -            | Thysanura     | -             | Nicoletiidae    | <i>Atelura formicaria</i>            | NC_011197         |
|          | Dicondylia   | -          | -            | Thysanura     | -             | Lepismatidae    | <i>Thermobia domestica</i>           | NC_006080         |
|          | Dicondylia   | -          | -            | Thysanura     | -             | Lepidotrichidae | <i>Tricholepidion gertschi</i>       | NC_005437         |
|          | Dicondylia   | Paleoptera | -            | Ephemeroptera | -             | Ephemeridae     | <i>Ephemera orientalis</i>           | NC_012645         |
|          | Dicondylia   | Paleoptera | -            | Ephemeroptera | -             | Heptageniidae   | <i>Parafronurus youi</i>             | NC_011359         |
|          | Dicondylia   | Paleoptera | -            | Ephemeroptera | -             | Siphonuridae    | <i>Siphonurus immanis</i>            | NC_013822         |
|          | Dicondylia   | Paleoptera | -            | Ephemeroptera | -             | Isonychiidae    | <i>Isonychia ignota</i>              | HM143892          |
|          | Dicondylia   | Paleoptera | -            | Ephemeroptera | -             | Siphonuridae    | <i>Siphuriscus chinensis</i>         | HQ875717          |
|          | Dicondylia   | Paleoptera | -            | Odonata       | -             | Gomphidae       | <i>Davidius lunatus</i>              | NC_012644         |
|          | Dicondylia   | Paleoptera | -            | Odonata       | -             | Euphaeidae      | <i>Euphaea formosa</i>               | NC_014493         |
| Outgroup | Dicondylia   | Paleoptera | -            | Odonata       | -             | Pseudolestidae  | <i>Pseudolestes mirabilis</i>        | NC_020636         |
|          | Dicondylia   | Paleoptera | -            | Odonata       | -             | Libellulidae    | <i>Orthetrum triangulare melania</i> | AB126005          |
|          | Dicondylia   | Neoptera   | Paraneoptera | Cicadomorpha  | Membracoidea  | Cicadellidae    | <i>Homalodisca coagulata</i>         | AY875213          |
|          | Dicondylia   | Neoptera   | Paraneoptera | Cicadomorpha  | Cercopoidea   | Aphrophoridae   | <i>Philaenus spumarius</i>           | AY630340          |
|          | Dicondylia   | Neoptera   | Paraneoptera | Coleorrhyncha | -             | Peloriidiidae   | <i>Hackeriella veitchi</i>           | GQ884145          |
|          | Dicondylia   | Neoptera   | Paraneoptera | Coleorrhyncha | -             | Peloriidiidae   | <i>Xenophyes cascus</i>              | JF323862          |
|          | Dicondylia   | Neoptera   | Paraneoptera | Fulgoromorpha | Fulgoroidea   | Flatidae        | <i>Geisha distinctissima</i>         | FJ230961          |
|          | Dicondylia   | Neoptera   | Paraneoptera | Fulgoromorpha | -             | Fulgoridae      | <i>Lycorma delicatula</i>            | EU909203          |
|          | Dicondylia   | Neoptera   | Paraneoptera | Fulgoromorpha | -             | Fulgoridae      | <i>Pyrops candelaria</i>             | FJ006724          |
|          | Dicondylia   | Neoptera   | Paraneoptera | Heteroptera   | Pentatomoidea | Plataspidae     | <i>Coptosoma bifaria</i>             | EU427334          |
|          | Dicondylia   | Neoptera   | Paraneoptera | Heteroptera   | Lygaeoidea    | Lygaeidae       | <i>Geocoris pallidipennis</i>        | EU427336          |
|          | Dicondylia   | Neoptera   | Paraneoptera | Heteroptera   | Gerroidea     | Gerridae        | <i>Aquarius paludum</i>              | FJ456944          |
|          | Dicondylia   | Neoptera   | Paraneoptera | Heteroptera   | Pentatomoidea | Pentatomidae    | <i>Halyomorpha halys</i>             | FJ685650          |
|          | Dicondylia   | Neoptera   | Paraneoptera | Heteroptera   | -             | Anthocoridae    | <i>Orius niger</i>                   | EU427341          |

|            |            |              |               |                |                  |                                 |                                |           |
|------------|------------|--------------|---------------|----------------|------------------|---------------------------------|--------------------------------|-----------|
| Dicondylia | Neoptera   | Paraneoptera | Heteroptera   | -              | Reduviidae       | <i>Triatoma dimidiata</i>       | NC_002609                      |           |
| Dicondylia | Neoptera   | Paraneoptera | Psocoptera    | -              | Lepidopsocidae   | <i>Lepidopsocid</i> sp.         | NC_004816                      |           |
| Dicondylia | Neoptera   | Holometabola | Coleoptera    | -              | Histeridae       | <i>Euspilotus scissus</i>       | GU176344                       |           |
| Dicondylia | Neoptera   | Holometabola | Coleoptera    | Chrysomeloidea | Cerambycidae     | <i>Monochamus alternatus</i>    | JX987292                       |           |
| Dicondylia | Neoptera   | Holometabola | Coleoptera    | -              | Curculionidae    | <i>Naupactus xanthographus</i>  | GU176345                       |           |
| Dicondylia | Neoptera   | Holometabola | Diptera       | Muscoidea      | Muscidae         | <i>Musca domestica</i>          | EU154477                       |           |
| Dicondylia | Neoptera   | Holometabola | Diptera       | Trichoceroidea | Trichoceridae    | <i>Paracladura trichoptera</i>  | JN861751                       |           |
| Dicondylia | Neoptera   | Holometabola | Diptera       | Oestroidea     | Calliphoridae    | <i>Pollenia rudis</i>           | JX913761                       |           |
| Dicondylia | Neoptera   | Holometabola | Hymenoptera   | Apoidea        | Apidae           | <i>Apis cerana</i>              | GQ162109                       |           |
| Dicondylia | Neoptera   | Holometabola | Hymenoptera   | Sphecoidea     | Crabronidae      | <i>Philanthus triangulum</i>    | NC_017007                      |           |
| Dicondylia | Neoptera   | Holometabola | Hymenoptera   | Vespoidea      | Formicidae       | <i>Pristomyrmex punctatus</i>   | AB556946                       |           |
| Dicondylia | Neoptera   | Holometabola | Lepidoptera   | Hesperioidea   | Hesperiidae      | <i>Ctenoptilum vasava</i>       | JF713818                       |           |
| Dicondylia | Neoptera   | Holometabola | Lepidoptera   | Noctuoidea     | Lymantriidae     | <i>Gynaephora menyuanensis</i>  | KC185412                       |           |
| Dicondylia | Neoptera   | Holometabola | Lepidoptera   | Noctuoidea     | Noctuidae        | <i>Spodoptera exigua</i>        | JX316220                       |           |
| Dicondylia | Neoptera   | Holometabola | Mecoptera     | -              | Bittacidae       | <i>Bittacus pilicornis</i>      | HQ696578                       |           |
| Dicondylia | Neoptera   | Holometabola | Mecoptera     | -              | Nannochoristidae | <i>Microchorista philpotti</i>  | HQ696580                       |           |
| Dicondylia | Neoptera   | Holometabola | Mecoptera     | -              | Panorpidae       | <i>Neopanorpa pulchra</i>       | FJ169955                       |           |
| Dicondylia | Neoptera   | Holometabola | Neuroptera    | -              | Chrysopidae      | <i>Apochrysa matsumurae</i>     | NC_015095                      |           |
| Dicondylia | Neoptera   | Holometabola | Neuroptera    | -              | Chrysopidae      | <i>Chrysoperla nipponensis</i>  | NC_015093                      |           |
| Dicondylia | Neoptera   | Holometabola | Neuroptera    | -              | Ascalaphidae     | <i>Ascalohybris subjacens</i>   | KC758703                       |           |
| Dicondylia | Neoptera   | Holometabola | Raphidioptera | -              | Raphidiidae      | <i>Mongoloraphidia harmandi</i> | NC_013251                      |           |
| Dicondylia | Neoptera   | Holometabola | Strepsiptera  | -              | Mengenillidae    | <i>Mengenilla moldrzyki</i>     | NC_018545                      |           |
| Dicondylia | Neoptera   | Holometabola | Strepsiptera  | -              | Stylopidae       | <i>Xenos vesparum</i>           | DQ364229                       |           |
| Ingroup    | Dicondylia | Neoptera     | Polyneoptera  | Plecoptera     | Perloidea        | Pteronarcyidae                  | <i>Pteronarcys princeps</i>    | NC_006133 |
|            | Dicondylia | Neoptera     | Polyneoptera  | Plecoptera     | Perloidea        | Perlidae                        | <i>Acroneuria hainana</i>      | NC_026104 |
|            | Dicondylia | Neoptera     | Polyneoptera  | Plecoptera     | Perloidea        | Pteronarcyidae                  | <i>Pteronarcella badia</i>     | NC_029248 |
|            | Dicondylia | Neoptera     | Polyneoptera  | Plecoptera     | Perloidea        | Chloroperlidae                  | <i>Sweltsa longistyla</i>      | KM216826  |
|            | Dicondylia | Neoptera     | Polyneoptera  | Plecoptera     | Perloidea        | Perlidae                        | <i>Kamimuria chungnanshana</i> | NC_028076 |
|            | Dicondylia | Neoptera     | Polyneoptera  | Plecoptera     | Perloidea        | Perlidae                        | <i>Togoperla</i> sp. KW-2014   | KM409708  |

|            |          |              |                  |                 |                  |                                      |                 |
|------------|----------|--------------|------------------|-----------------|------------------|--------------------------------------|-----------------|
| Dicondylia | Neoptera | Polyneoptera | Plecoptera       | Perloidea       | Perlidae         | <i>Dinocras cephalotes</i>           | NC_022843       |
| Dicondylia | Neoptera | Polyneoptera | Plecoptera       | Perloidea       | Styloperlidae    | <i>Styloperla sp.</i>                | KR08897         |
| Dicondylia | Neoptera | Polyneoptera | Plecoptera       | Nemouroidea     | Capniidae        | <i>Apteroperla tikumana</i>          | NC_027698       |
| Dicondylia | Neoptera | Polyneoptera | Plecoptera       | Nemouroidea     | Capniidae        | <i>Mesocapnia arizonensis</i>        | KP642637        |
| Dicondylia | Neoptera | Polyneoptera | Dermaptera       | Pygidicranoidea | Pygidicranidae   | <i>Challia fletcheri</i>             | NC_018538       |
| Dicondylia | Neoptera | Polyneoptera | Dermaptera       | Anisolabidoidea | Anisolabididae   | <b><i>Euborellia arcanum</i></b>     | <b>KX673196</b> |
| Dicondylia | Neoptera | Polyneoptera | Dermaptera       | Anisolabidoidea | Labiduridae      | <b><i>Labidura japonica</i></b>      | <b>KX673201</b> |
| Dicondylia | Neoptera | Polyneoptera | Dermaptera       | Anisolabidoidea | Anisolabididae   | <b>Anisolabididae sp.</b>            | <b>KX673197</b> |
| Dicondylia | Neoptera | Polyneoptera | Embioptera       | -               | Oligotomidae     | <i>Aposthonia japonica</i>           | AB639034        |
| Dicondylia | Neoptera | Polyneoptera | Zoraptera        | -               | Zorotypidae      | <i>Zorotypus medoensis</i>           | NC_026077       |
| Dicondylia | Neoptera | Polyneoptera | Grylloblattodea  | -               | Grylloblattidae  | <i>Grylloblatta sculleni</i>         | DQ241796        |
| Dicondylia | Neoptera | Polyneoptera | Mantophasmatodea | -               | Mantophasmatidae | <i>Sclerophasma paresisense</i>      | NC_007701       |
| Dicondylia | Neoptera | Polyneoptera | Mantodea         | -               | Mantidae         | <i>Tamolanica tamolana</i>           | NC_007702       |
| Dicondylia | Neoptera | Polyneoptera | Mantodea         | -               | Mantidae         | <b><i>Tenodera sinensis</i></b>      | <b>KX673199</b> |
| Dicondylia | Neoptera | Polyneoptera | Mantodea         | -               | Liturgusidae     | <i>Theopompa sp.</i> FY-2016a Hainan | KU201313        |
| Dicondylia | Neoptera | Polyneoptera | Mantodea         | -               | Liturgusidae     | <i>Humbertiella nada</i>             | NC_030264       |
| Dicondylia | Neoptera | Polyneoptera | Mantodea         | -               | Tarachodidae     | <i>Leptomantella albella</i>         | NC_024028       |
| Dicondylia | Neoptera | Polyneoptera | Mantodea         | -               | Hymenopodidae    | <i>Creobroter gemmatus</i>           | NC_030267       |
| Dicondylia | Neoptera | Polyneoptera | Mantodea         | -               | Hymenopodidae    | <i>Anaxarcha zhengi</i>              | NC_030268       |
| Dicondylia | Neoptera | Polyneoptera | Mantodea         | -               | Mantidae         | <i>Statilia sp.</i>                  | KU201316        |
| Dicondylia | Neoptera | Polyneoptera | Mantodea         | -               | Mantidae         | <i>Mantis religiosa</i>              | NC_030265       |
| Dicondylia | Neoptera | Polyneoptera | Mantodea         | -               | Mantidae         | <i>Tamolanica tamolana</i>           | NC_00770        |
| Dicondylia | Neoptera | Polyneoptera | Mantodea         | -               | Mantidae         | <i>Hierodula formosana</i>           | NC_029326       |
| Dicondylia | Neoptera | Polyneoptera | Blattodea        | Corydioidea     | Corydiidae       | <b><i>Eupolyphaga sp.</i></b>        | <b>KX673200</b> |
| Dicondylia | Neoptera | Polyneoptera | Blattodea        | Corydioidea     | Corydiidae       | <i>Eupolyphaga sinensis</i>          | FJ830540        |

|            |          |              |           |             |                 |                                     |           |
|------------|----------|--------------|-----------|-------------|-----------------|-------------------------------------|-----------|
| Dicondylia | Neoptera | Polyneoptera | Blattodea | -           | -               | Blattodea sp. MT-2014 isolate CL191 | KM244690  |
| Dicondylia | Neoptera | Polyneoptera | Blattodea | Blaberoidea | Ectobiidae      | <i>Blattella germanica</i>          | EU854321  |
| Dicondylia | Neoptera | Polyneoptera | Blattodea | Blaberoidea | Ectobiidae      | <i>Blattella bisignata</i>          | JX233805  |
| Dicondylia | Neoptera | Polyneoptera | Blattodea | Blaberoidea | Blaberidae      | <i>Panchlora nivea</i>              | KU684412  |
| Dicondylia | Neoptera | Polyneoptera | Blattodea | Blaberoidea | Blaberidae      | <i>Opisthoptatia orientalis</i>     | NC_029225 |
| Dicondylia | Neoptera | Polyneoptera | Blattodea | Blaberoidea | Blaberidae      | <i>Gromphadorhina portentosa</i>    | NC_030001 |
| Dicondylia | Neoptera | Polyneoptera | Blattodea | Blaberoidea | Blaberidae      | <i>Blaptica dubia</i> voucher dby-1 | NC_029224 |
| Dicondylia | Neoptera | Polyneoptera | Blattodea | Blaberoidea | Blaberidae      | <i>Blaptica dubia</i>               | KU684410  |
| Dicondylia | Neoptera | Polyneoptera | Blattodea | Blaberoidea | Blattidae       | <i>Periplaneta fuliginosa</i>       | AB126004  |
| Dicondylia | Neoptera | Polyneoptera | Blattodea | Blaberoidea | Blattidae       | <i>Shelfordella lateralis</i>       | NC_030003 |
| Dicondylia | Neoptera | Polyneoptera | Blattodea | Blaberoidea | Blattidae       | <i>Periplaneta americana</i>        | NC_016956 |
| Dicondylia | Neoptera | Polyneoptera | Blattodea | Blaberoidea | Cryptocercidae  | <i>Cryptocercus kyebangensis</i>    | NC_030191 |
| Dicondylia | Neoptera | Polyneoptera | Blattodea | Blaberoidea | Cryptocercidae  | <i>Cryptocercus relictus</i>        | JX144941  |
| Dicondylia | Neoptera | Polyneoptera | Isoptera  | -           | Hodotermitidae  | <i>Microhodotermes viator</i>       | JX144931  |
| Dicondylia | Neoptera | Polyneoptera | Isoptera  | -           | Kalotermitidae  | <i>Neotermes insularis</i>          | JX144933  |
| Dicondylia | Neoptera | Polyneoptera | Isoptera  | -           | Mastotermitidae | <i>Mastotermes darwiniensis</i>     | JX144929  |
| Dicondylia | Neoptera | Polyneoptera | Isoptera  | -           | Rhinotermitidae | <i>Coptotermes formosanus</i>       | NC_015800 |
| Dicondylia | Neoptera | Polyneoptera | Isoptera  | -           | Rhinotermitidae | <i>Heterotermes</i> sp.             | JX144936  |
| Dicondylia | Neoptera | Polyneoptera | Isoptera  | -           | Rhinotermitidae | <i>Reticulitermes flavipes</i>      | EF206314  |
| Dicondylia | Neoptera | Polyneoptera | Isoptera  | -           | Rhinotermitidae | <i>Reticulitermes hageni</i>        | EF206320  |
| Dicondylia | Neoptera | Polyneoptera | Isoptera  | -           | Rhinotermitidae | <i>Reticulitermes santonensis</i>   | NC_009499 |
| Dicondylia | Neoptera | Polyneoptera | Isoptera  | -           | Rhinotermitidae | <i>Reticulitermes virginicus</i>    | EF206318  |
| Dicondylia | Neoptera | Polyneoptera | Isoptera  | -           | Rhinotermitidae | <i>Schedorhinotermes breinli</i>    | JX144935  |
| Dicondylia | Neoptera | Polyneoptera | Isoptera  | -           | Termitidae      | <i>Drepanotermes</i> sp.            | JX144938  |
| Dicondylia | Neoptera | Polyneoptera | Isoptera  | -           | Termitidae      | <i>Macrognathotermes errator</i>    | JX144939  |

|            |          |              |            |            |             |                                      |          |
|------------|----------|--------------|------------|------------|-------------|--------------------------------------|----------|
| Dicondylia | Neoptera | Polyneoptera | Isoptera   | -          | Termitidae  | <i>Macrotermes barneyi</i>           | JX050221 |
| Dicondylia | Neoptera | Polyneoptera | Isoptera   | -          | Termitidae  | <i>Macrotermes subhyalinus</i>       | JX144937 |
| Dicondylia | Neoptera | Polyneoptera | Isoptera   | -          | Termitidae  | <i>Nasutitermes triodiae</i>         | JX144940 |
| Dicondylia | Neoptera | Polyneoptera | Isoptera   | -          | Termopsidae | <i>Porotermes adamsoni</i>           | JX144930 |
| Dicondylia | Neoptera | Polyneoptera | Isoptera   | -          | Termopsidae | <i>Zootermopsis angusticollis</i>    | JX144932 |
| Dicondylia | Neoptera | Polyneoptera | Orthoptera | Acridoidea | Acrididae   | <i>Acrida cinerea</i>                | GU344100 |
| Dicondylia | Neoptera | Polyneoptera | Orthoptera | Acridoidea | Acrididae   | <i>Acrida willemsei</i>              | EU938372 |
| Dicondylia | Neoptera | Polyneoptera | Orthoptera | Acridoidea | Acrididae   | <i>Arcyptera coreana</i>             | GU324311 |
| Dicondylia | Neoptera | Polyneoptera | Orthoptera | Acridoidea | Acrididae   | <i>Calliptamus italicus</i>          | EU938373 |
| Dicondylia | Neoptera | Polyneoptera | Orthoptera | Acridoidea | Acrididae   | <i>Ceracris kiangsu</i>              | GU270284 |
| Dicondylia | Neoptera | Polyneoptera | Orthoptera | Acridoidea | Acrididae   | <i>Chondracris rosea</i>             | GU249619 |
| Dicondylia | Neoptera | Polyneoptera | Orthoptera | Acridoidea | Acrididae   | <i>Chorthippus chinensis</i>         | EU029161 |
| Dicondylia | Neoptera | Polyneoptera | Orthoptera | Acridoidea | Acrididae   | <i>Euchorthippus fusigeniculatus</i> | HM583652 |
| Dicondylia | Neoptera | Polyneoptera | Orthoptera | Acridoidea | Acrididae   | <i>Gastrimargus marmoratus</i>       | EU513373 |
| Dicondylia | Neoptera | Polyneoptera | Orthoptera | Acridoidea | Acrididae   | <i>Gomphocerippus rufus</i>          | GU294759 |
| Dicondylia | Neoptera | Polyneoptera | Orthoptera | Acridoidea | Acrididae   | <i>Gomphocerus licenti</i>           | GQ180102 |
| Dicondylia | Neoptera | Polyneoptera | Orthoptera | Acridoidea | Acrididae   | <i>Gomphocerus sibiricus</i>         | JX122541 |
| Dicondylia | Neoptera | Polyneoptera | Orthoptera | Acridoidea | Acrididae   | <i>Lithidiopsis carinatus</i>        | JX913770 |
| Dicondylia | Neoptera | Polyneoptera | Orthoptera | Acridoidea | Acrididae   | <i>Locusta migratoria</i>            | X80245   |
| Dicondylia | Neoptera | Polyneoptera | Orthoptera | Acridoidea | Acrididae   | <i>Oedaleus decorus asiaticus</i>    | EU513374 |
| Dicondylia | Neoptera | Polyneoptera | Orthoptera | Acridoidea | Acrididae   | <i>Ognevia longipennis</i>           | EU914848 |
| Dicondylia | Neoptera | Polyneoptera | Orthoptera | Acridoidea | Acrididae   | <i>Oxya chinensis</i>                | EF437157 |
| Dicondylia | Neoptera | Polyneoptera | Orthoptera | Acridoidea | Acrididae   | <i>Phlaeoba albonema</i>             | EU370925 |
| Dicondylia | Neoptera | Polyneoptera | Orthoptera | Acridoidea | Acrididae   | <i>Prumna arctica</i>                | GU294758 |
| Dicondylia | Neoptera | Polyneoptera | Orthoptera | Acridoidea | Acrididae   | <i>Schistocerca gregaria</i>         | GQ491031 |

|            |          |              |            |                   |                   |                                         |                 |
|------------|----------|--------------|------------|-------------------|-------------------|-----------------------------------------|-----------------|
| Dicondylia | Neoptera | Polyneoptera | Orthoptera | Acridoidea        | Acrididae         | <i>Traulia szetschuanensis</i>          | EU914849        |
| Dicondylia | Neoptera | Polyneoptera | Orthoptera | Acridoidea        | Acrididae         | <b><i>Oxya hyla</i></b>                 | <b>KX673203</b> |
| Dicondylia | Neoptera | Polyneoptera | Orthoptera | Acridoidea        | Acrididae         | <b><i>Acrida cinerea</i></b>            | <b>KX673195</b> |
| Dicondylia | Neoptera | Polyneoptera | Orthoptera | Eumastacoidea     | Episactidae       | <i>Pielomastax zhengi</i>               | JF411955        |
| Dicondylia | Neoptera | Polyneoptera | Orthoptera | Grylloidea        | Gryllidae         | <b><i>Trigonidomorpha sjostedti</i></b> | <b>KX673205</b> |
| Dicondylia | Neoptera | Polyneoptera | Orthoptera | Grylloidea        | Gryllidae         | <b><i>Loxoblemmus doenitzi</i></b>      | <b>KX673202</b> |
| Dicondylia | Neoptera | Polyneoptera | Orthoptera | Grylloidea        | Gryllidae         | <i>Teleogryllus emma</i>                | EU557269        |
| Dicondylia | Neoptera | Polyneoptera | Orthoptera | Grylloidea        | Gryllotalpidae    | <i>Gryllotalpa orientalis</i>           | AY660929        |
| Dicondylia | Neoptera | Polyneoptera | Orthoptera | Grylloidea        | Gryllotalpidae    | <i>Gryllotalpa pluvialis</i>            | EU938371        |
| Dicondylia | Neoptera | Polyneoptera | Orthoptera | Grylloidea        | Gryllotalpidae    | <i>Myrmecophilus manni</i>              | EU938370        |
| Dicondylia | Neoptera | Polyneoptera | Orthoptera | Acridoidea        | Lentulidae        | <i>Lentula callani</i>                  | JX913769        |
| Dicondylia | Neoptera | Polyneoptera | Orthoptera | Acridoidea        | Ommexechidae      | <i>Ommexecha virens</i>                 | JX913775        |
| Dicondylia | Neoptera | Polyneoptera | Orthoptera | Pamphagoidea      | Pamphagidae       | <i>Asiotmethis zacharjini</i>           | JX468876        |
| Dicondylia | Neoptera | Polyneoptera | Orthoptera | Pamphagoidea      | Pamphagidae       | <i>Filchnerella helanshanensis</i>      | JX468877        |
| Dicondylia | Neoptera | Polyneoptera | Orthoptera | Pamphagoidea      | Pamphagidae       | <i>Pseudotmethis rubimarginis</i>       | JX468878        |
| Dicondylia | Neoptera | Polyneoptera | Orthoptera | Pamphagoidea      | Pamphagidae       | <i>Thrinchus schrenkii</i>              | GU181288        |
| Dicondylia | Neoptera | Polyneoptera | Orthoptera | Pneumoroidea      | Pneumoridae       | <i>Physemacris variolosa</i>            | GU945504        |
| Dicondylia | Neoptera | Polyneoptera | Orthoptera | Pneumoroidea      | Pneumoridae       | <i>Tanaocerus koebelei</i>              | JX913774        |
| Dicondylia | Neoptera | Polyneoptera | Orthoptera | Tettigonioidea    | Prophalangopsidae | <i>Tarragoilus diuturnus</i>            | JQ999995        |
| Dicondylia | Neoptera | Polyneoptera | Orthoptera | Acridoidea        | Pyrgacrididae     | <i>Pyrgacris descampsi</i>              | JX913771        |
| Dicondylia | Neoptera | Polyneoptera | Orthoptera | Pyrgomorpoidea    | Pyrgomorphidae    | <i>Atractomorpha sinensis</i>           | EU263919        |
| Dicondylia | Neoptera | Polyneoptera | Orthoptera | Pyrgomorpoidea    | Pyrgomorphidae    | <i>Mekongiana xiangchengensis</i>       | HM583653        |
| Dicondylia | Neoptera | Polyneoptera | Orthoptera | Pyrgomorpoidea    | Pyrgomorphidae    | <i>Mekongiella xizangensis</i>          | HM583654        |
| Dicondylia | Neoptera | Polyneoptera | Orthoptera | Rhaphidophoroidea | Rhaphidophoridae  | <i>Troglophilus neglectus</i>           | EU938374        |
| Dicondylia | Neoptera | Polyneoptera | Orthoptera | Acridoidea        | Romaleidae        | <i>Xyleus modestus</i>                  | GU945503        |
| Dicondylia | Neoptera | Polyneoptera | Orthoptera | Tetrigoidea       | Tetrigidae        | <i>Alulatettix yunnanensis</i>          | JQ272702        |



|            |          |              |             |                |                  |                                      |                 |
|------------|----------|--------------|-------------|----------------|------------------|--------------------------------------|-----------------|
| Dicondylia | Neoptera | Polyneoptera | Orthoptera  | Tetrigioidea   | Tetrigidae       | <i>Anabrus simplex</i>               | EF373911        |
| Dicondylia | Neoptera | Polyneoptera | Orthoptera  | Tetrigioidea   | Tetrigidae       | <i>Tetrix japonica</i>               | EU623447        |
| Dicondylia | Neoptera | Polyneoptera | Orthoptera  | Tettigonioidea | Tettigoniidae    | <b><i>Ducetia</i> sp.</b>            | <b>KX673198</b> |
| Dicondylia | Neoptera | Polyneoptera | Orthoptera  | Tettigonioidea | Tettigoniidae    | <i>Conocephalus maculatus</i>        | HQ711931        |
| Dicondylia | Neoptera | Polyneoptera | Orthoptera  | Tettigonioidea | Tettigoniidae    | <i>Deracantha onos</i>               | EU137664        |
| Dicondylia | Neoptera | Polyneoptera | Orthoptera  | Tettigonioidea | Tettigoniidae    | <i>Elimaea cheni</i>                 | GU323362        |
| Dicondylia | Neoptera | Polyneoptera | Orthoptera  | Tettigonioidea | Tettigoniidae    | <i>Gampsocleis gratiosa</i>          | EU527333        |
| Dicondylia | Neoptera | Polyneoptera | Orthoptera  | Tettigonioidea | Tettigoniidae    | <i>Mecopoda elongata</i>             | JQ917910        |
| Dicondylia | Neoptera | Polyneoptera | Orthoptera  | Tettigonioidea | Tettigoniidae    | <i>Mecopoda niponensis</i>           | JQ917909        |
| Dicondylia | Neoptera | Polyneoptera | Orthoptera  | Tettigonioidea | Tettigoniidae    | <i>Ruspolia dubia</i>                | EF583824        |
| Dicondylia | Neoptera | Polyneoptera | Orthoptera  | Tettigonioidea | Tettigoniidae    | <i>Xizicus fascipes</i>              | JQ326212        |
| Dicondylia | Neoptera | Polyneoptera | Orthoptera  | Tridactyloidea | Tridactylidae    | <b><i>Tridactylus</i> sp.</b>        | <b>KX673204</b> |
| Dicondylia | Neoptera | Polyneoptera | Orthoptera  | Tridactyloidea | Tridactylidae    | <i>Ellipes minuta</i>                | GU945502        |
| Dicondylia | Neoptera | Polyneoptera | Orthoptera  | Acridoidea     | Tristiridae      | <i>Tristira magellanica</i>          | JX913765        |
| Dicondylia | Neoptera | Polyneoptera | Phasmatodea | Bacilloidea    | Bacillidae       | <i>Bacillus atticus</i>              | GU001955        |
| Dicondylia | Neoptera | Polyneoptera | Phasmatodea | Bacilloidea    | Bacillidae       | <i>Bacillus rossius</i>              | GU001956        |
| Dicondylia | Neoptera | Polyneoptera | Phasmatodea | -              | Diapheromeridae  | <i>Micadina phluctainoides</i>       | AB477466        |
| Dicondylia | Neoptera | Polyneoptera | Phasmatodea | -              | Diapheromeridae  | <i>Sipylodea sipylus</i>             | AB477470        |
| Dicondylia | Neoptera | Polyneoptera | Phasmatodea | Bacilloidea    | Heteropterygidae | <i>Heteropteryx dilatata</i>         | AB477468        |
| Dicondylia | Neoptera | Polyneoptera | Phasmatodea | Bacilloidea    | Heteropterygidae | <i>Orestes mouhotii</i>              | AB477462        |
| Dicondylia | Neoptera | Polyneoptera | Phasmatodea | -              | Phasmatidae      | <i>Entoria okinawaensis</i>          | AB477459        |
| Dicondylia | Neoptera | Polyneoptera | Phasmatodea | -              | Phasmatidae      | <i>Extatosoma tiaratum</i>           | AB642680        |
| Dicondylia | Neoptera | Polyneoptera | Phasmatodea | -              | Phasmatidae      | <i>Megacrania alpheus adan</i>       | AB477471        |
| Dicondylia | Neoptera | Polyneoptera | Phasmatodea | -              | Phasmatidae      | <i>Neohirasea japonica</i>           | AB477469        |
| Dicondylia | Neoptera | Polyneoptera | Phasmatodea | -              | Phasmatidae      | <i>Phobaeticus serratipes</i>        | NC_014678       |
| Dicondylia | Neoptera | Polyneoptera | Phasmatodea | -              | Phasmatidae      | <i>Phraortes illepidus</i>           | NC_014695       |
| Dicondylia | Neoptera | Polyneoptera | Phasmatodea | -              | Phasmatidae      | <i>Phraortes</i> sp. Miyako Island   | AB477465        |
| Dicondylia | Neoptera | Polyneoptera | Phasmatodea | -              | Phasmatidae      | <i>Phraortes</i> sp. Iriomote Island | AB477464        |
| Dicondylia | Neoptera | Polyneoptera | Phasmatodea | -              | Phasmatidae      | <i>Ramulus hainanense</i>            | FJ156750        |
| Dicondylia | Neoptera | Polyneoptera | Phasmatodea | -              | Phasmatidae      | <i>Ramulus irregulariterdentatus</i> | NC_014702       |

|            |          |              |             |              |             |                            |          |
|------------|----------|--------------|-------------|--------------|-------------|----------------------------|----------|
| Dicondylia | Neoptera | Polyneoptera | Phasmatodea | Phylloidea   | Phylliidae  | <i>Phyllium giganteum</i>  | AB477461 |
| Dicondylia | Neoptera | Polyneoptera | Phasmatodea | Timematoidea | Timematidae | <i>Timema californicum</i> | DQ241799 |

---

Note: Bold indicates the species newly sequenced in this study.

**Table S2. Species-specific primers designed for amplifying "Bait" sequences and control region.**

| Upstream primers | Sequence (5'-3')        | Downstream primers | Sequence (5'-3')         |
|------------------|-------------------------|--------------------|--------------------------|
| cox1_F           | TATTGGTGGTTTTGGAAATTG   | cox1_R             | GCTCGTGTATCAACGTCTATTCC  |
| cytb_F           | GTATTACCATGAGGACAAATATC | cytb_R             | TTCAACTGGTTGTATCCCAATTCA |
| rrnS_F           | GTACATTTACTTTGTTACGACTT | rrnS_R             | GTGCCAGCAGTTGCGGTAAAC    |

Note: F, forward; R, reverse.
